# Supplementary material for: Taxonomy of the Genus Halophila Thouars (Hydocharitaceae): A Review
Source: MDPI journal article supplement (doi:10.3390/plants9121732), 2020-12-08
Supplement: s1 [file s1]

## Supplementary B1

### The Locality, Collector and Herbarium Information of Botanical Drawings for the *Halophila* Species

|            | Species                           | Locality, collector, herbarium                                                                                                                              |
|------------|-----------------------------------|-------------------------------------------------------------------------------------------------------------------------------------------------------------|
| Figure S1  | <i>Halophila australis</i>        | South Australian Coast, 14 m, <i>H. Kirkman</i> (CSIRO)<br>Tasmania Low Head, <i>F Perrin</i> (HO)<br>Queens Cliff, Victoria, <i>Lucas</i> 3214 (NSW, type) |
| Figure S2  | <i>Halophila major</i>            | Malaysia, Johor, <i>Shafei</i> 1380 (Univ Malaya)                                                                                                           |
| Figure S3  | <i>Halophila ovalis</i>           | Queensland, Green Is., 25m, <i>R Coles s.n.</i> (UWA R311, wet)                                                                                             |
| Figure S4  | <i>Halophila bullosa</i>          | Samoa, <i>T. Powell</i> (K)                                                                                                                                 |
| Figure S5  | <i>Halophila minor</i>            | Indonesia, Java, <i>HF Neubauer</i> 601 (L)                                                                                                                 |
| Figure S6  | <i>Halophila gaudichardii</i>     | Guam, Mona Bay, <i>B Stone</i> 4063 (L)                                                                                                                     |
| Figure S7  | <i>Halophila linearis</i>         | Mozambique, Inhaca Is., <i>Mogg</i> 29309, 27730 (L)                                                                                                        |
| Figure S8  | <i>Halophila ramamurthiana</i>    | India, Gujarat, (UWA, dry)                                                                                                                                  |
| Figure S9  | <i>Halophila mikii</i>            | Japan, Tanegashima, type (KYO)                                                                                                                              |
| Figure S10 | <i>Halophila nipponica</i>        | Japan, Chiba, Tateyama, <i>Y. Hrano s.n.</i> (UWA R340, 338, wet)                                                                                           |
| Figure S11 | <i>Halophila okinawensis</i>      | Okinawa, Kin Bay, <i>Kanamoto s.n.</i> (UWA R490, wet)                                                                                                      |
| Figure S12 | <i>Halophila hawaiiiana</i>       | Hawaii, Oahu, Kahola Beach, <i>Kanamoto s.n.</i> (UWA R135, wet)<br>Kailua Beach, <i>FR Forsberg</i> 55603 (US)                                             |
| Figure S13 | <i>Halophila johnsonii</i>        | Florida, <i>Moffler</i> 225 (USF)                                                                                                                           |
| Figure S14 | <i>Halophila madagascariensis</i> | Madagascar, type collection (P)                                                                                                                             |
| Figure S15 | <i>Halophila stipulacea</i>       | Elate Gulf, <i>Lipkin</i> 14473 (Tel Aviv Univ.)                                                                                                            |
| Figure S16 | <i>Halophila balfourii</i>        | Mauritius, Grand Bay, <i>Mortensen s.n.</i> (BM, C, K)                                                                                                      |
| Figure S17 | <i>Halophila decipiens</i>        | Sydney Harbor, <i>Brazier &amp; Ramsey</i> 3199 (NSW)                                                                                                       |
| Figure S18 | <i>Halophila capricorni</i>       | Green Is., Queensland (UWA R271, wet)<br><i>Elford Reef, 11m, Lyle</i> (UWA R 261, wet)                                                                     |
| Figure S19 | <i>Halophila sulawesii</i>        | Indonesia, Sulawesi Is., <i>Veheji</i> 417, 542 (L)                                                                                                         |
| Figure S20 | <i>Halophila beccarii</i>         | Trang, Thailand, <i>Kuo</i> (UWA, wet)                                                                                                                      |
| Figure S21 | <i>Halophila engelmannii</i>      | Florida, Virginia Key, <i>Hawe</i> 125 (NY)                                                                                                                 |
| Figure S22 | <i>Halophila baillonis</i>        | Proto Rico, <i>Howe</i> 221 (C, NY)                                                                                                                         |
| Figure S23 | <i>Halophila spinulosa</i>        | Carnarvon, WA, Australia, <i>Ostenfeld</i> 274 (C, NY)                                                                                                      |
| Figure S24 | <i>Halophila tricostata</i>       | Queensland, Corwie Pt. 31 m, (QFH 67 & UWA R374, wet)                                                                                                       |

Note that Figure S1, Figure S12 and Figure S18 have used more than one specimen.

#### Legend applies to all botanical drawings (Figures S1-S24).

|                          |                           |                          |                    |
|--------------------------|---------------------------|--------------------------|--------------------|
| <b>A:</b> anther         | <b>ES:</b> Extended Shoot | <b>FF:</b> Female Flower | <b>Fr:</b> Fruit   |
| <b>MF:</b> Male flower   | <b>P:</b> Petiole         | <b>PS:</b> Petiole Scale | <b>RM:</b> Rhizome |
| <b>RS:</b> Rhizome Scale | <b>St:</b> Style          | <b>YF:</b> Young Fruit   |                    |
