# Supplementary material for: Taxonomy of the Genus Halophila Thouars (Hydocharitaceae): A Review
Source: MDPI journal article supplement (doi:10.3390/plants9121732), 2020-12-08
Supplement: s1 [file s1]

## Supplementary A

### *Halophila* Specimens Studied from the Following Herbaria

| Herbarium |                                                      | Specimen No. |
|-----------|------------------------------------------------------|--------------|
| AD        | South Australia State Herbarium                      | 89           |
| APF       | Universidade de São Paulo, Brazil                    | 7            |
| BISH      | Bishop Museum & Herbarium                            | 49           |
| BO        | Herbarium Bogoriensis, Indonesia                     | 35           |
| BSI       | Botanical Survey of India                            | 25           |
| C         | Copenhagen Botanical Garden Herbarium                | 82           |
| CAN       | Canberra National Herbarium                          | 6            |
| DNA       | Northern Territory Herbarium, Darwin                 | 5            |
| F         | Philippine Univ., Marine Science Institute Herbarium | 30           |
| GU        | Guam University Herbarium                            | 34           |
| HO        | Tasmania, Hobart Herbarium                           | 8            |
| HW        | The Hebrew University of Jerusalem                   | 13           |
| K         | Kew Botanical Garden Herbarium                       | 115          |
| KL        | Kasetsart University, Thailand                       | 13           |
| KYO       | University of Kyoto Herbarium, Japan                 | 8            |
| LA        | Larkum Collection, Sydney                            | 27           |
| MOZ       | Universidade Eduardo Mondlane Herbarium              | 19           |
| NHB       | British Natural History Museum                       | 122          |
| L         | Leiden Herbarium                                     | 184          |
| MEL       | Victoria National Herbarium                          | 56           |
| MELU      | University of Melbourne                              | 26           |
| NSM       | National Science Museum, Tokyo                       | 15           |
| NSW       | New South Wales State Herbarium                      | 90           |
| NY        | New York Botanical Garden Herbarium                  | 75           |
| PERTH     | Western Australia Herbarium, Perth                   | 49           |
| PRE       | National Herbarium Pretoria, South Africa            | 23           |
| QFH       | Queensland Fishery Herbarium                         | 30           |
| QH        | Queensland State Herbarium                           | 47           |
| S         | Naturhistoriska Riksmuseet Stockholm, Sweden         | 27           |
| SBG       | Singapore Botanical Garden Herbarium                 | 39           |
| SS        | Selmar Schonland, South Africa                       | 20           |
| TNS       | Tokyo National Science Herbarium                     | 17           |
| UC        | University of California, Berkeley                   | 202          |
| UM        | University of Malaysia                               | 14           |
| US        | Smithsonian Institute Herbarium                      | 107          |
| USF       | University of South Florida                          | 41           |
| UT        | University of Tokyo Herbarium                        | 23           |
| UWA       | University WA Botany Herbarium                       | 230          |
| W         | Vienna National Museum                               | 41           |
| YLH       | Tel Aviv University Herbarium                        | 124          |
| Z         | Zurich Botanic Garden Herbarium                      | 35           |
