# Supplementary figures and images for: Taxonomy of the Genus Halophila Thouars (Hydocharitaceae): A Review
Source: MDPI journal article supplement (doi:10.3390/plants9121732), 2020-12-08

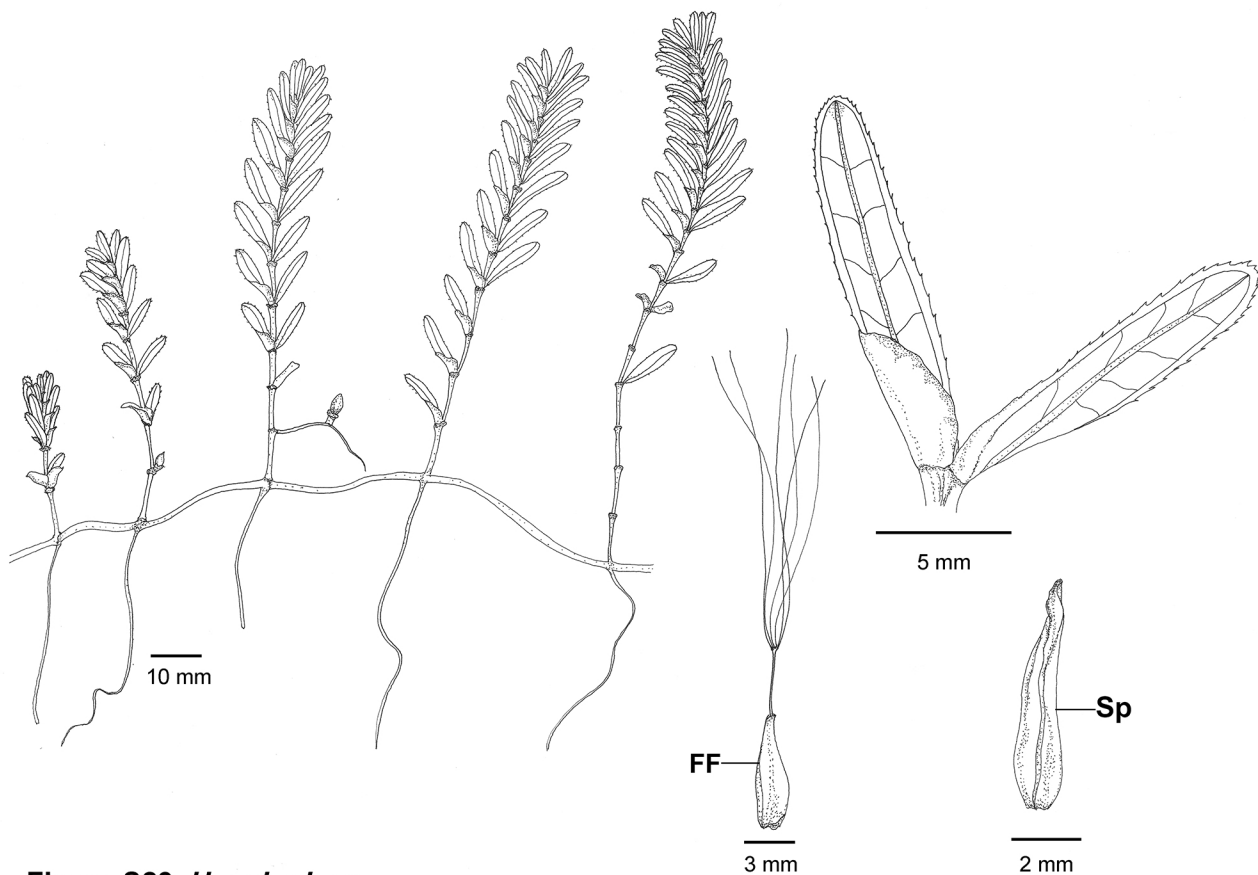

**Figure S23** *H. spinulosa*

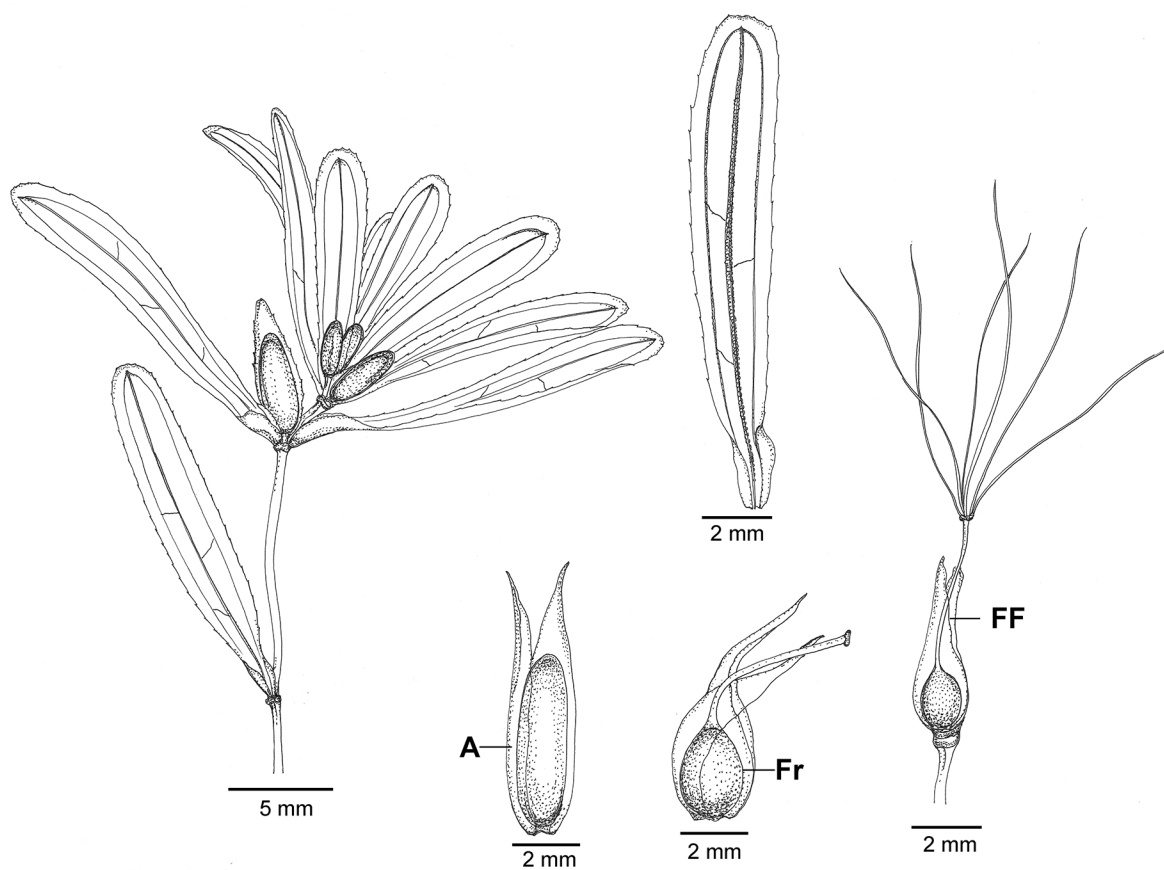

**Figure S24** *H. tricostata*

Supplement: s1 [file s1]

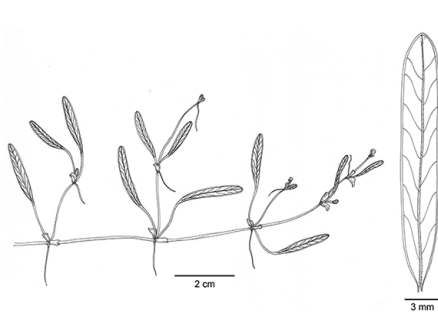

Figure S13 *H. johnsonii*

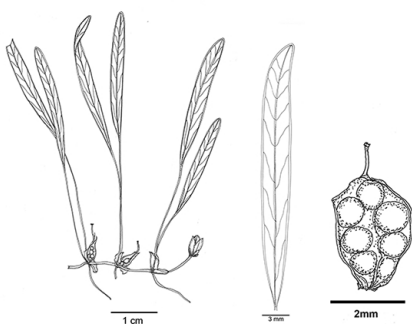

Figure S14 *H. madagascariensis*

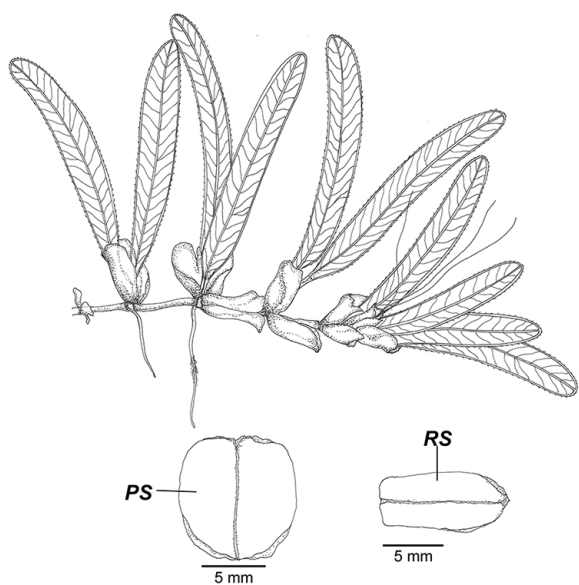

Figure S15 *H. stipulacea*

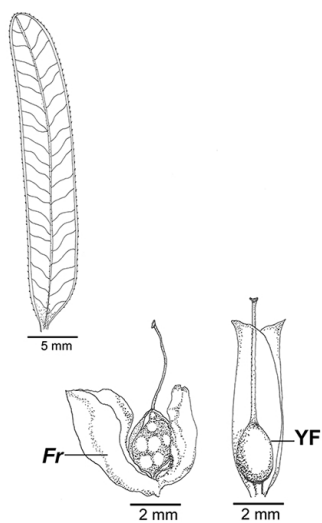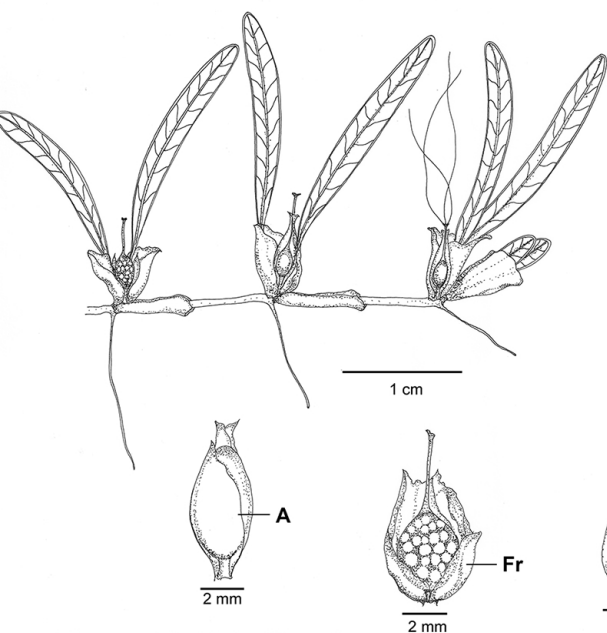

Figure 16 *H. balfourii*

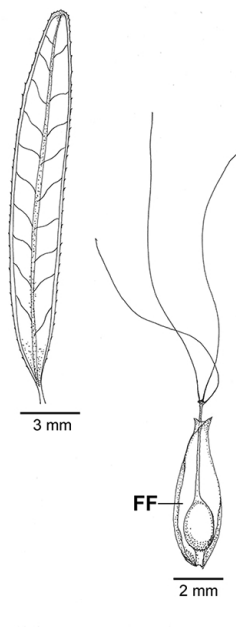

Supplement: s1 [file s1]

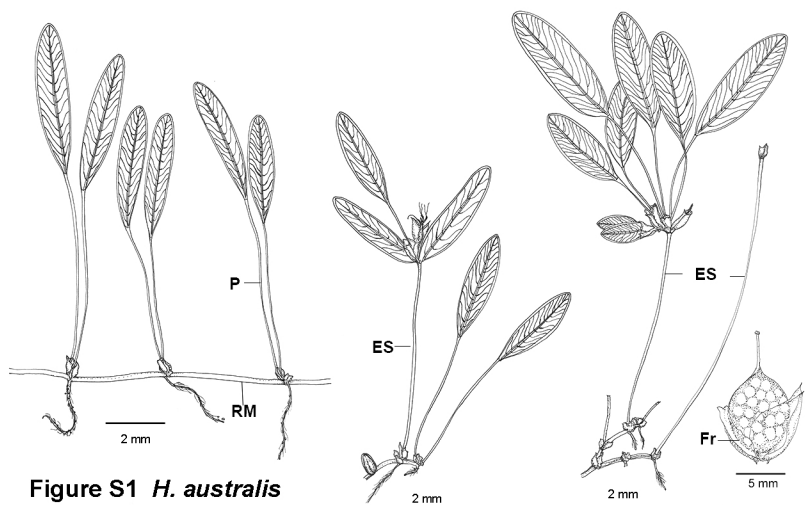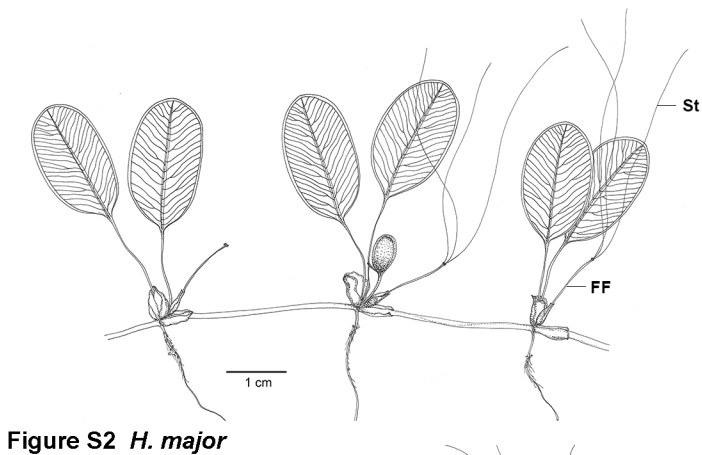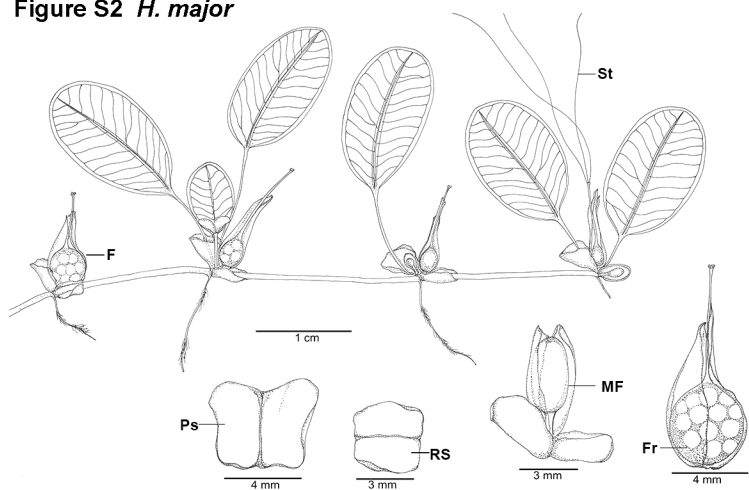

Supplement: s1 [file s1]

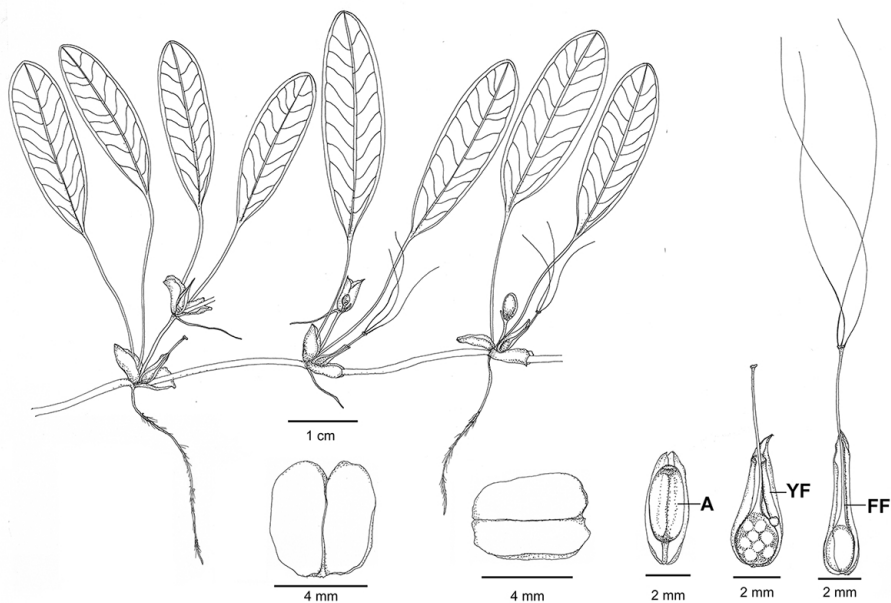

**Figure S10** *H. nipponica*

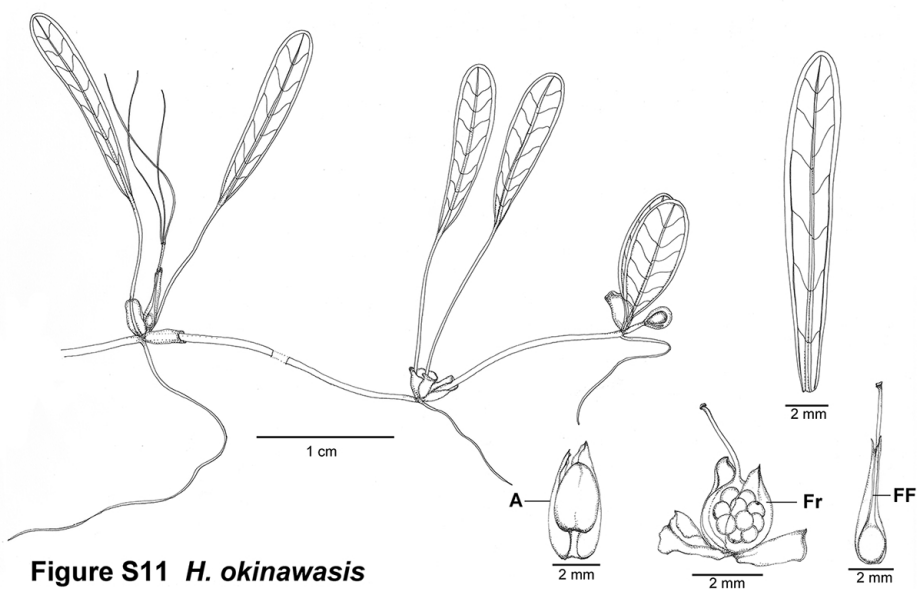

**Figure S11** *H. okinawasis*

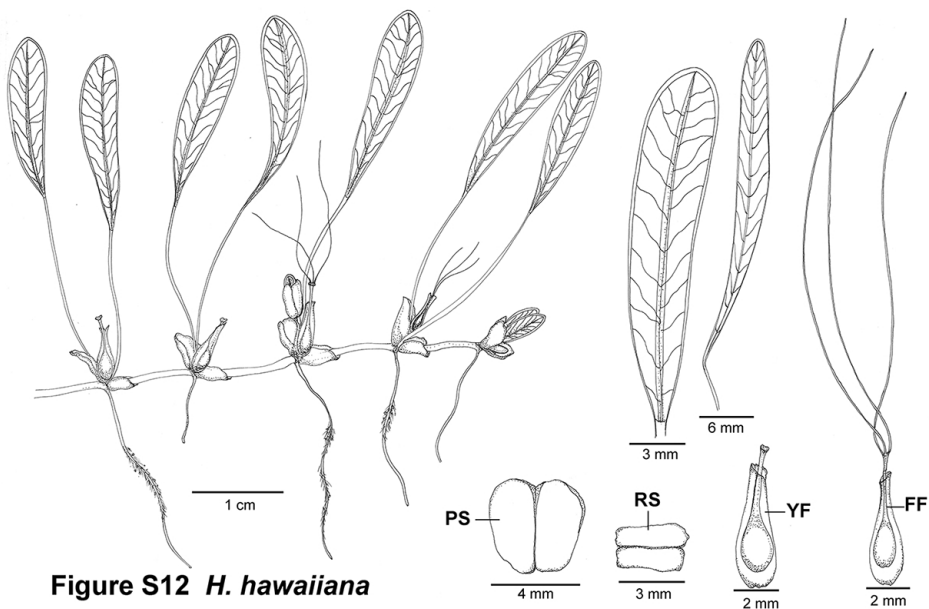

**Figure S12** *H. hawaiiiana*

Supplement: s1 [file s1]

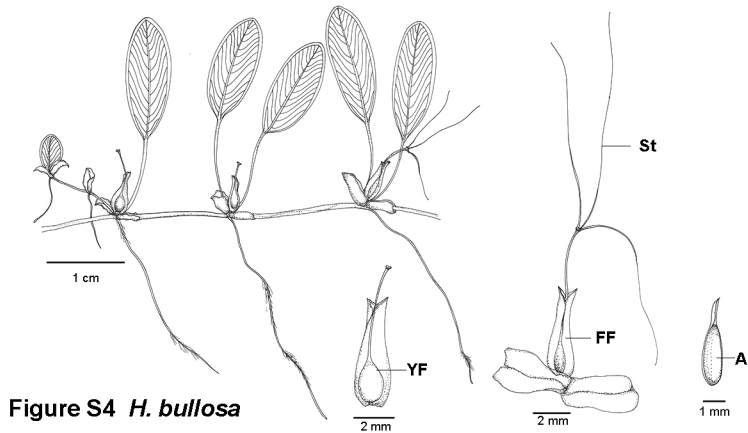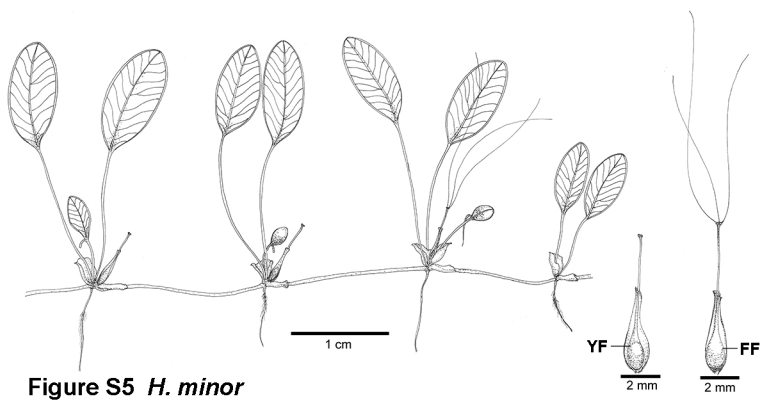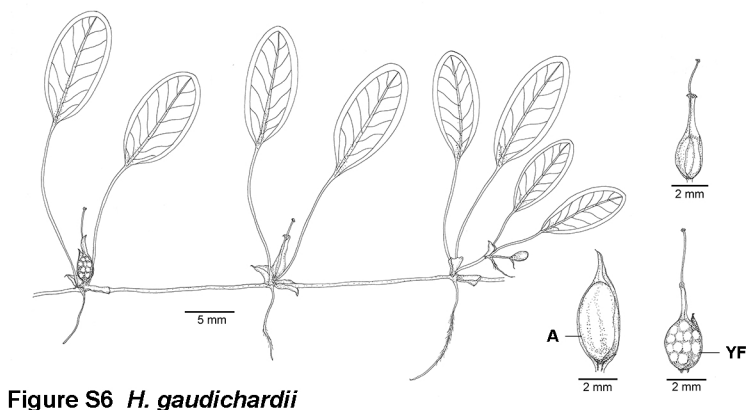

Supplement: s1 [file s1]

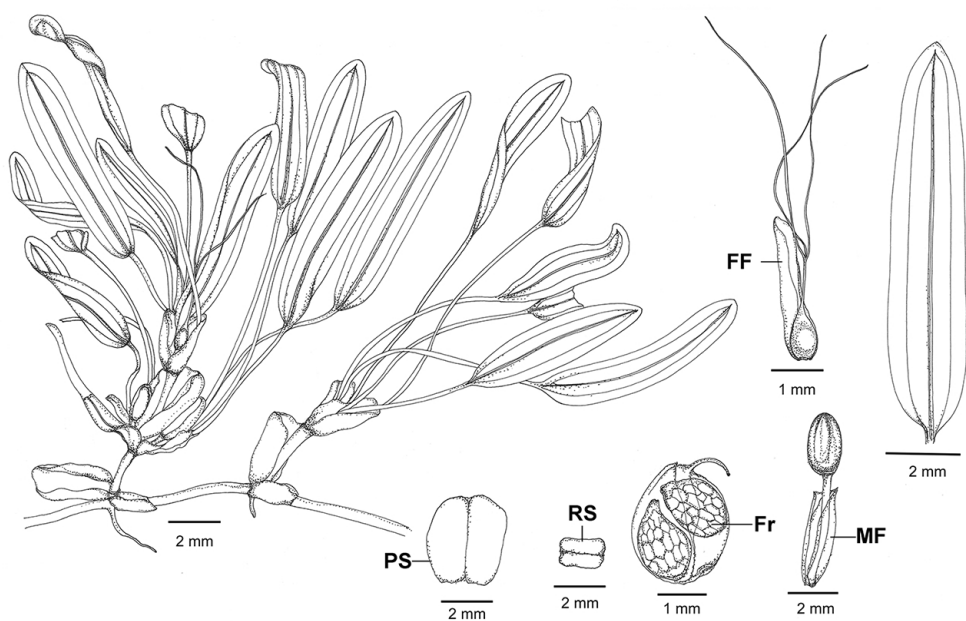

**Figure S20** *H. beccarii*

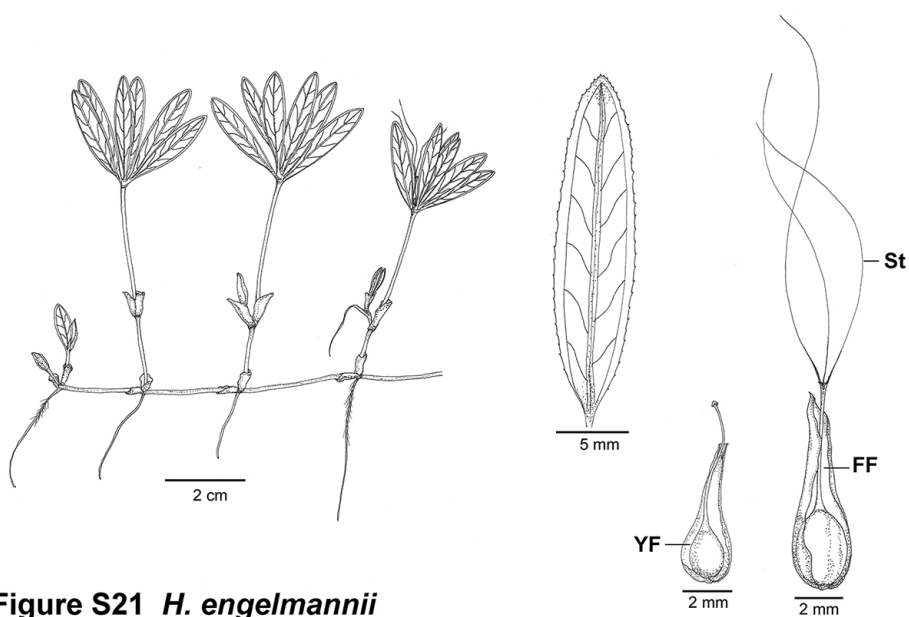

**Figure S21** *H. engelmannii*

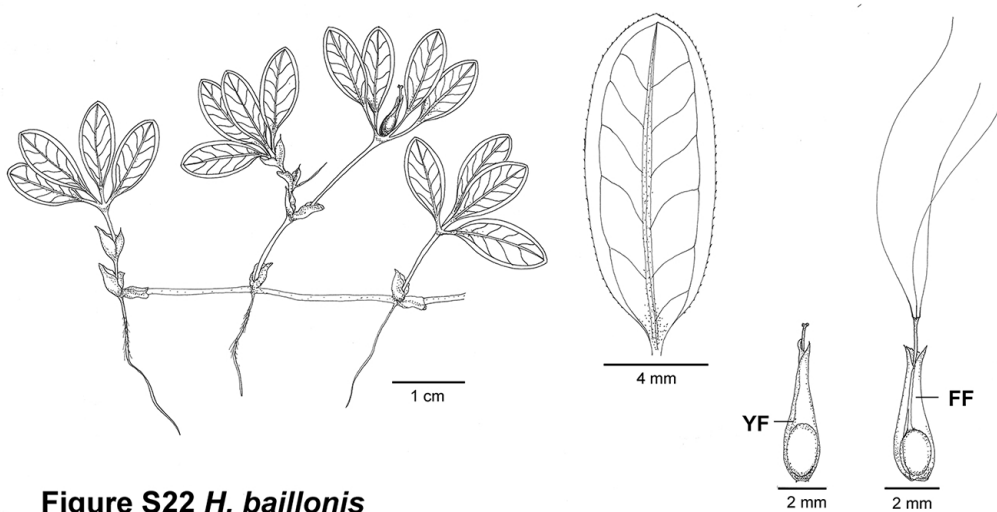

**Figure S22** *H. baillonis*

Supplement: s1 [file s1]

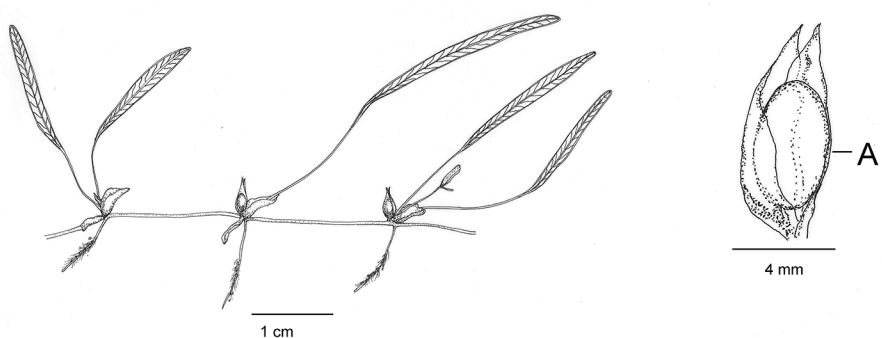

**Figure S7** *H. linearis*

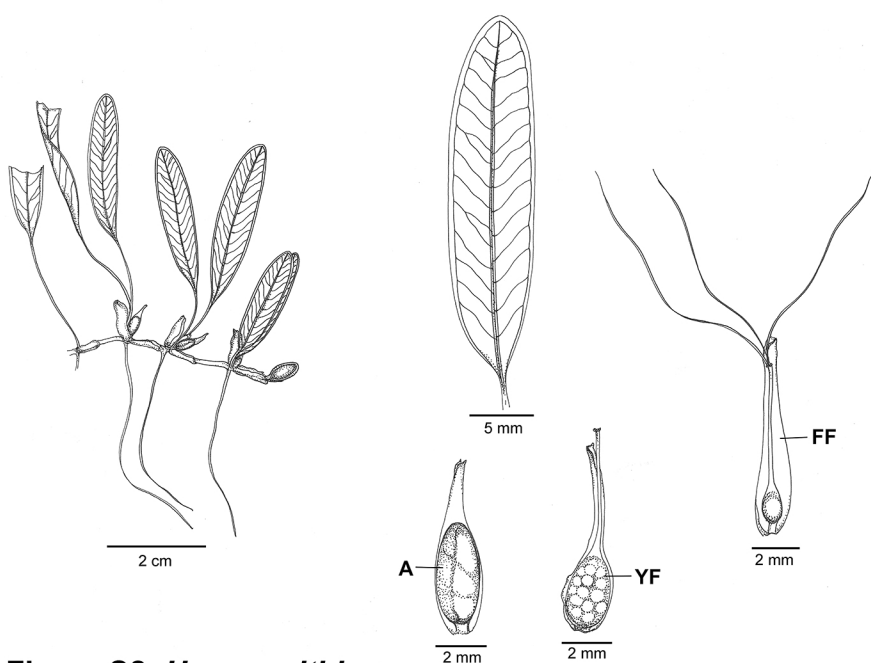

**Figure S8** *H. namarithiana*

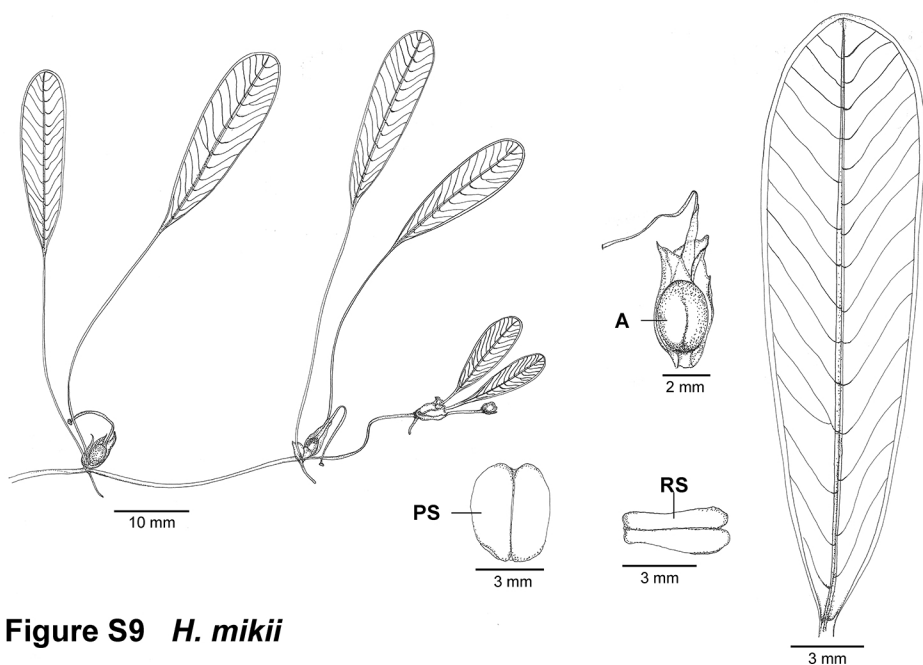

**Figure S9** *H. mikii*

Supplement: s1 [file s1]

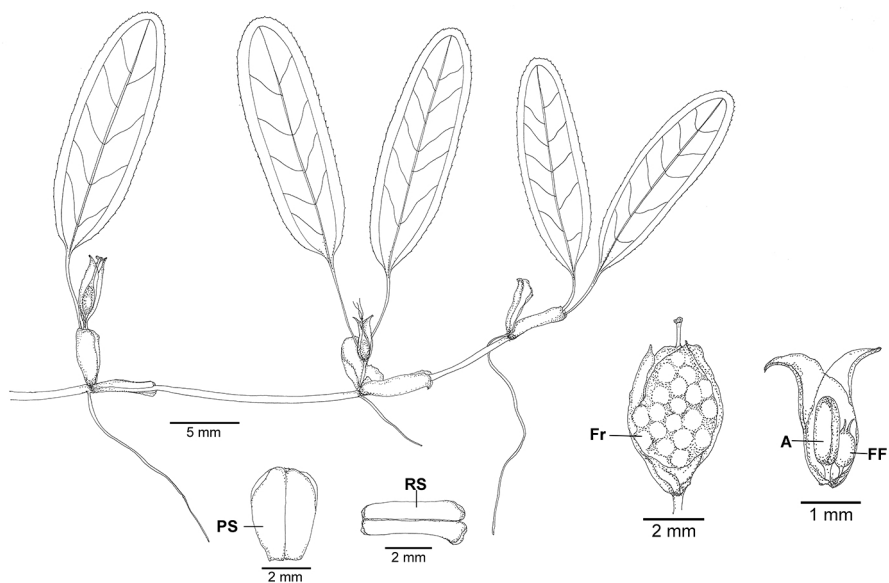

**Figure S17** *H. decipiens*

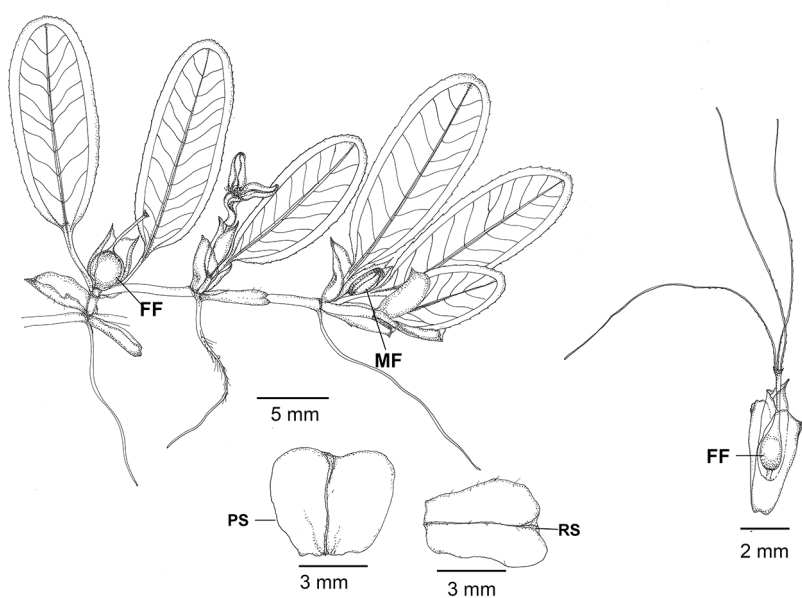

**Figure S18** *H. capricorni*

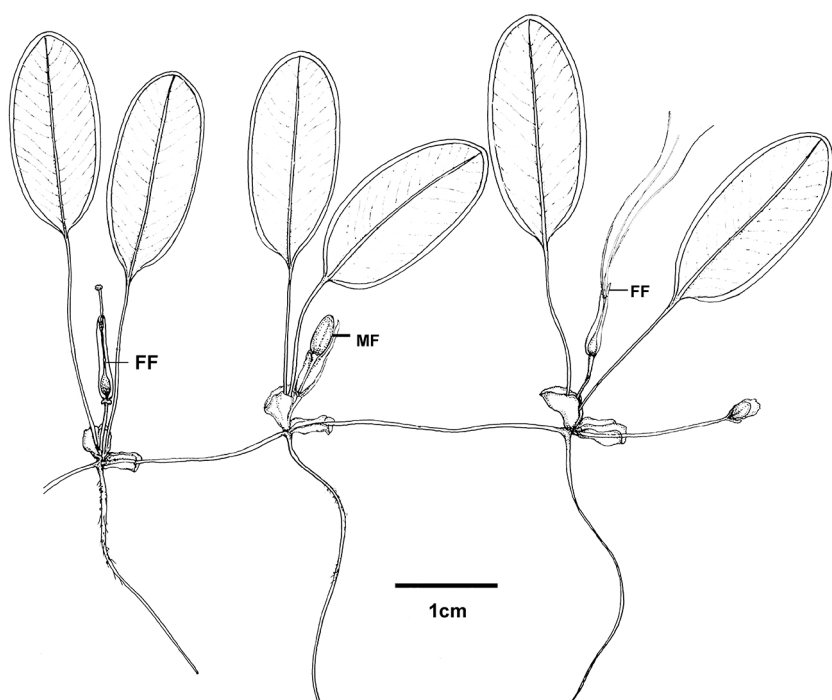

**Figure S19** *H. sulawesii*

Supplement: s1 [file s1]
